# Supplementary material for: A systematic review of global publications on clouded leopard (Neofelis nebulosa): identifying the publication trends, research gaps, and future directions to strengthen its conservation
Source: PeerJ. 2025 Dec 19;13:e20421. doi: 10.7717/peerj.20421 (PMC12721108; doi:10.7717/peerj.20421)
Supplement: Supplemental Information 2 [file peerj-13-20421-s002.xlsx]

## Sheet: Sheet1
Country	Publications	Range_Status
Bhutan	12	Range
China	25	Range
Denmark	2	Non-range
Germany	3	Non-range
Bangladesh	5	Range
Combodia	5	Range
India	25	Range
Indonesia	5	Range
Ireland	1	Non-range
Japan	5	Non-range
Laos	6	Range
Malaysia	21	Range
Myanmar	8	Range
Nepal	16	Range
Taiwan	8	Range
Thailand	28	Range
UK	7	Non-range
USA	24	Non-range
Vietnam	2	Range
