# Supplementary material for: A systematic review of global publications on clouded leopard (Neofelis nebulosa): identifying the publication trends, research gaps, and future directions to strengthen its conservation
Source: PeerJ. 2025 Dec 19;13:e20421. doi: 10.7717/peerj.20421 (PMC12721108; doi:10.7717/peerj.20421)
Supplement: Supplemental Information 3 [file peerj-13-20421-s003.xlsx]

## Sheet: C Leopard review datasheet
S.No.	Research tittle	Year	Country	Study area classification	Thematic focus	Species focus	Land tenure	Specify PA	Study methods	Study type	Research approach	Study duration	Addressed threats	Recommendation measures
1	Natural Rearing of Clouded Leopard Neofelis nebulosa at Frankfurt Zoo	1965	Germany	non-range	conservation	captivity	captive	Frankfurt zoo	non-Invasive	empirical study	species sign survey, population observation	na	na	na
2	Breeding Clouded Leopards Neofelis nebulosa at Dallas Zoo	1965	USA	non-range	conservation	captivity	captive	na	non-Invasive	empirical study	species sign survey, population observation	na	na	na
3	Breeding the Clouded leopard at Dublin Zoo	1976	Ireland	non-range	conservation	captivity	captive	Dublin Zoo	non-Invasive	empirical study	species sign survey, population observation	na	na	na
4	Clouded leopard, Neofelis nebulosa, New host for dilofilaria immitis	1983	Japan	non-range	threats	captivity	captive	Ueno Zoo	invasive	empirical study	diagnosis and treatment	na	na	na
5	A case of double infection with Brugia pahangi Buckley and Edeson 1956, and Dirofilaria immitis Leidy 1856, in a Malaysian clouded leopard, Neofelis nebulosa	1986	Malaysia	range	anatomy and physiology	captivity	captive	na	invasive	empirical study	diagnosis and treatment	na	diseases	na
6	Reproductive Physiology of the Clouded Leopard: I. Electroejaculates Contain High Proportions of Pleiomorphic Spermatozoa throughout the Year	1986	USA	non-range	anatomy and physiology	captivity	captive	na	invasive	empirical study	laboratory analysis	na	na	research and monitoring
7	Reproductive Physiology of the Clouded Leopard: II. A Circannual Analysis of Adrenal-Pituitary-Testicular Relationships during Electroejaculation or after an Adrenocorticotropin Hormone Challenge	1986	USA	non-range	anatomy and physiology	captivity	captive	na	invasive	empirical study	laboratory analysis	7-12 months	na	na
8	The clouded leopard in Malaysian Borneo	1987	Malaysia	range	population	wild	opa	na	non-Invasive	empirical study	species sign survey, population observation	1-6 months	habitat loss and fragmentation	research and monitoring
9	The clouded leopard in Taiwan	1988	Taiwan	range	habitat use and distribution	wild	pa	na	non-Invasive	empirical study	social survey, population observation	na	habitat loss and fragmentation	research and monitoring
10	Reproductive Parameters of Clouded Leopards (Neofelis nebulosa)	1989	USA	non-range	ethology	captivity	captive	na	non-Invasive	secondary analysis	Secondary data	na	na	conservation plans and policies
11	The clouded leopard in Nepal	1989	Nepal	range	conservation	wild	pa	Chitwan National Park	non-Invasive	empirical study	population observation	na	na	conservation plans and policies
12	The clouded leopard in Assam	1993	India	range	threats	wild	both	na	non-Invasive	secondary analysis	secondary data	na	habitat loss and fragmentation	na
13	Natural Versus Chorionic Gonadotropin-lnduced Ovarian Responses in the Clouded Leopard (Neofelis nebulosa) Assessed by Fecal Steroid Analysis	1995	USA	non-range	anatomy and physiology	captivity	captive	na	invasive	empirical study	diagnosis and treatment	na	na	na
14	Goat Predation by Clouded Leopard (Neofelis Nebulosa) In Kakoi Reserve Forest of Assam	1996	India	range	threats	wild	pa	Kakoi Reserve Forest	non-Invasive	empirical study	species sign survey, population observation	na	na	na
15	Successful Ovulation Induction and Laparoscopic Intrauterine Artificial Insemination in the Clouded Leopard (Neofelis nebulosa)	1996	USA	non-range	anatomy and physiology	captivity	captive	na	invasive	empirical study	diagnosis and treatment	na	na	na
16	Intestinal adenocarcinoma with neuroendocrinecells in a clouded leopard (Neofelis nebulosa)	1996	Japan	non-range	anatomy and physiology	captivity	captive	na	Invasive	empirical study	diagnosis and treatment	na	na	na
17	Lung Carcinoma in a Clouded Leopard (Neofelis nebulosa)	1996	Japan	non-range	anatomy and physiology	captivity	captive	na	invasive	empirical study	diagnosis and treatment	1-6 months	na	na
18	Sensitivity to Exogenous Gonadotropins for Ovulation Induction and Laparoscopic Artificial Insemination in the Cheetah and Clouded Leopard	1997	USA	non-range	anatomy and physiology	captivity	captive	na	Invasive	empirical study	laboratory analysis	na	na	na
19	Behaviour of a Captive Pair of Clouded Leopards (Neofelis Nebulosa): Introduction without Injury	1998	UK	non-range	ethology	captivity	captive	Glasgow zoo	non-Invasive	empirical study	species sign survey, population observation	2-3years	na	na
20	Pleural malignant mesothelioma in a captive clouded leopard (Neofelis nebulosa nebulosa)	1998	China	range	anatomy and physiology	captivity	captive	na	invasive	empirical study	diagnosis and treatment	na	na	na
21	Hamatology of Tigers (Panthera tigris tigris), Leopards (Panthera pardus) and Clouded Leopards (Neofelis nebulosa) in Captivity	1999	India	range	anatomy and physiology	captivity	captive	na	Invasive	empirical study	laboratory analysis	na	na	research and monitoring
22	The Clouded Leopard: The " Littlest" Big Cat	2000	Nepal, Malaysia, USA,China, Taiwan	both	review/synthesis	both	both	Chitwan national park	both	secondary analysis	secondary data	na	illegal trade and poaching,habitat loss and fragmentation	research and monitoring
23	Phacoemulsification in a Clouded leopard (Neofelis nebulosa)	2001	USA	non-range	anatomy and physiology	captivity	captive	na	invasive	empirical study	diagnosis and treatment	more than 3 years	na	na
24	First Sighting of Clouded Leopard Neofelis nebulosa from the Blue Mountain national Park, Mizoram, India	2002	India	range	habitat use and distribution	wild	pa	Blue Mountain national Park	non-invasive	empirical study	Species sign survey and population observation	7-12months	habitat loss and fragmentation	habitat management
25	Ecology of Three Sympatric Felids in a Mixed Evergreen Forest in North Central Thailand	2005	Thailand	range	habitat use and distribution	wild	pa	Phu Khieo Wildlife Sanctuary	invasive	empirical study	telemetry	more than 3 years	illegal trade and poaching	research and monitoring
26	Challenges in Cryopreservation of Clouded Leopard (Neofelis nebulosa) Spermatozoa	2006	USA	non-range	conservation	captivity	captive	na	invasive	empirical study	laboratory analysis	na	na	research and monitoring
27	Geographical Variation in the Clouded Leopard, Neofelis nebulosa, Reveals Two Species	2006	Nepal,Bhutan,India,Myanmar,Thailand,Cambodia,Malaysia,Bangladesh,China,Taiwan,Indonesia	range	molecular ecology	wild	na	na	invasive	empirical study	laboratory analysis	na	habitat loss and fragmentation	research and monitoring
28	Sabertooth Characters in the Clouded Leopard (Neofelis nebulosa Griffiths 1821)	2006	Denmark,UK	non-range	molecular ecology	captivity	captive	na	invasive	empirical study	laboratory analysis	na	na	research and monitoring
29	The Mitochondrial Genome Structure of Clouded Leopard (Neofelis nebulosa)	2006	China	range	molecular ecology	wild	opa	na	invasive	empirical study	laboratory analysis	na	na	na
30	Observation of Phayre’s leaf Monkeys Mobbing a Clouded Leopard at Phu Khieo Wildlife Sanctuary (Thailand)	2006	Thailand	range	ethology	wild	pa	Phu Khieo Wildlife Sanctuary	non-invasive	empirical study	species sign survey and population observation	1-6months	na	na
31	GnRH Agonist Lupron1 (leuprolide acetate) Pre-Treatments Prevent Ovulation in Response to Gonadotropin Stimulation in the Clouded Leopard (Neofelis nebulosa)	2006	USA	non-range	anatomy and physiology	captivity	captive	na	invasive	empirical study	diagnosis and treatment	1-6months	na	na
32	A Study on Activity Pattern of Clouded Leopard (Neofelis nebulosa) in Gunung Basor and Stong Utara Forest Reserves, Kelantan, Malaysia	2006	Malaysia	range	ethology	wild	pa	Gunung Basor Forest Reserve (GBFR), Stong Utara Forest Reserve (SUFR), Kelantan	non-invasive	empirical study	camera trapping	1-6months	na	research and monitoring
33	Molecular Evidence for Species-Level Distinctions in Clouded Leopards	2006	Taiwan, India, China, Malaysia	range	molecular ecology	captivity	captive	na	both	empirical study	laboratory analysis	na	na	na
34	Clouded Leopards, the Secretive Top-Carnivore of South-East Asian Rainforests: their Distribution, Status and Conservation needs in Sabah, Malaysia	2006	Malaysia	range	habitat use and distribution	wild	pa	Tabin Wildlife Reserve	non-invasive	empirical study	species sign survey and population observation	7-12months	habitat loss and fragmentation	habitat management,research and monitoring
35	The Diversity and Activity Patterns of Wild Felids in a Secondary Forest in Peninsular Malaysia	2006	Malaysia	range	ethology	wild	pa	Jerangau Forest Reserve	non-invasive	empirical study	camera trapping	1-2years	na	na
36	Clouded Leopard Phylogeny Revisited: Support for Species Recognition and Population Division between Borneo and Sumatra	2007	Malaysia, UK, Cambodia, Thailand , Germany,Indonesia	both	molecular ecology	both	opa	na	non-invasive	empirical study	laboratory analysis	na	habitat loss and fragmentation	conservation plans and policies
37	Comparative Analysis of Hind Limb Muscles in the Clouded Leopard, Neofelis nebulosa, and Domestic Cat (Felis catus)	2007	USA	non-range	anatomy and physiology	captivity	captive	na	invasive	empirical study	laboratory analysis	na	na	na
38	Evolutionary Convergence of Primitive Sabertooth Craniomandibular Morphology: the Clouded Leopard (Neofelis nebulosa) and Paramachairodus ogygia compared	2008	Denmark, UK, Germany	non-range	molecular ecology	captivity	captive	na	invasive	empirical study	laboratory analysis	na	na	conservation plans and policies
39	Species Distinction and Evolutionary Differences in the Clouded leopard (Neofelis nebulosa) and Diard’s Clouded Leopard (Neofelis diardi)	2008	Malaysia,Indonesia,India, Bhutan, Thailand, Vietnam, China	range	molecular ecology	both	na	na	invasive	empirical study	laboratory analysis	na	habitat loss and fragmentation	na
40	Hematology, Cytochemistry and Ultrastructure of Blood Cells in Clouded Leopard (Neofelis nebulosa)	2008	Thailand	range	anatomy and physiology	captivity	captive	na	invasive	empirical study	laboratory analysis	na	na	na
41	Standardized Karyotype and Idiogram of the Clouded Leopard, Neofelis nebulosa (Carnivora, Felidae) by Conventional Staining, G-banding and High-resolution Staining Technique	2008	Thailand	range	anatomy and physiology	captivity	captive	na	invasive	empirical study	laboratory analysis	na	na	research and monitoring
42	In Vitro Embryo Production in the Clouded Leopard (Neofelis nebulosa)	2009	USA	non-range	conservation	captivity	captive	na	invasive	empirical study	laboratory analysis	na	na	na
43	Comparative Analysis of Paw Pad Structure in the Clouded Leopard (Neofelis nebulosa) and Domestic Cat (Felis catus)	2009	USA	non-range	anatomy and physiology	captivity	captive	na	invasive	empirical study	laboratory analysis	na	na	na
44	A Study on Activity Patterns of Clouded Leopard and Marbled Cat in Temengor Forest Reserve, Hulu Perak	2009	Malaysia	range	ethology	wild	pa	Temengor Forest Reserve, Hulu peak	non-invasive	empirical study	camera trapping	1-2years	na	research and monitoring
45	Ecology and Conservation of the Leopard Cat Prionailurus bengalensis and Clouded Leopard Neofelis nebulosa in Khao Yai national Park, Thailand	2010	Thailand	range	movement ecology	wild	pa	Khao Yai national park	invasive	empirical study	telemetry	1-2years	na	na
46	Chemical characterization of milk oligosaccharides of an African lion (Panthera leo) and a clouded leopard (Neofelis nebulosa)	2010	USA	non-range	diet and food dynamics	captivity	captive	na	invasive	empirical study	laboratory analysis	1-6months	na	na
47	First photograph of a Clouded Leopard at Pakke Tiger Reserve, India	2010	India	range	habitat use and distribution	wild	pa	Pakke Tiger Reserve	non-invasive	empirical study	camera trapping	1-6months	habitat loss and fragmentation,illegal trade and poaching	rules and regulations
48	Cat Research in China	2010	China	range	review	wild	both	na	both	secondary analysis	secondary data	na	illegal trade and poaching	research and monitoring
49	Clouded Leopard Neofelis nebulosa	2010	China	range	review	both	both	na	both	secondary analysis	secondary data	na	habitat loss and fragmentation,illegal trade and poaching	na
50	Gordonia neofelifaecis sp. nov., a Cholesterol Side-chain-cleaving Actinomycete Isolated from the Faeces of Neofelis nebulosa	2011	China	range	threats	captivity	captive	na	invasive	empirical study	diagnosis and treatment	na	na	na
51	Clouded Leopard Predation on a Wild Juvenile Siamang	2011	USA	non-range	diet and food dynamics	na	pa	Bukit Barisan Selatan National park, Lampung, Sumatra, Indonesia	non-invasive	empirical study	species sign survey and population observation	1-2years	na	research and monitoring
52	A Neotype of the Clouded Leopard (Neofelis nebulosa Griffith 1821)	2011	UK, Thailand	non-range	molecular ecology	na	opa	na	invasive	empirical study	laboratory analysis	na	na	na
53	Draft Genome Sequence of Gordonia neofelifaecis NRRL B-59395, a Cholesterol-degrading Actinomycete	2011	China	range	molecular ecology	na	na	na	invasive	empirical study	laboratory analysis	na	disease	na
54	Hip and Thigh Anatomy of the Clouded Leopard (Neofelis nebulosa) with Comparisons to the Domestic Cat (Felis catus)	2012	USA	non-range	anatomy and physiology	captivity	captive	na	invasive	empirical study	diagnosis and treatment	na	na	na
55	Clouded Leopard in Shivapuri Nagarjun National park, Nepal	2012	Nepal	range	habitat use and distribution	wild	pa	Shivapuri National park	non-invasive	empirical study	camera trapping	1-6months	na	research and monitoring
56	Optimal Attractants to Increase Visits by Clouded Leopards to Remote-Camera Sets	2012	USA	non-range	ethology	captivity	captive	na	non-invasive	empirical study	camera trapping	1-6months	na	research and monitoring
57	Abundance and Density Estimates for Common Leopard Panthera pardus and Clouded Leopard Neofelis nebulosa in Manas National park, Assam, India	2013	India	range	population	wild	pa	Manas National park	non-invasive	empirical study	camera trapping	1-6months	illegal trade and poaching	research and monitoring
58	Behavioral Reactions Relate to Adrenal Activity and Temperament in Male Clouded Leopards (Neofelis nebulosa)	2013	USA	non-range	ethology	captivity	captive	na	non-invasive	empirical study	social survey,laboratory analysis	1-6months	na	research and monitoring
59	Clouded Leopard Camera_x0002_Trapped in the Annapurna Conservation Area, Nepal	2013	Nepal	range	habitat use and distribution	wild	pa	Annapurna Conservation area	non-invasive	empirical study	camera trapping	1-6months	habitat loss and fragmentation	research and monitoring
60	Cutaneous Atypical Mycobacteriosis in a Clouded Leopard (Neofelis nebulosa)	2013	USA	non-range	anatomy and physiology	captivity	captive	na	invasive	empirical study	diagnosis and treatment	na	disease	na
61	Terrestrial Activity Patterns of Wild Cats from Camera-Trapping	2013	Thailand	range	ethology	wild	pa	Bang Lang NP,Hala-Bala WS ,Huai Kha Kaeng WS , Kaeng Krachan NP , Khao Ang Rue Nai WS, Khao Sam Roi Yod NP , Khao Sok NP, Khao Yai NP, Kuiburi NP, Phu Khieo WS, Ta Phraya NP, Thale Noi NH, Thap Lan NP, ThungYai -West WS	non-invasive	empirical study	camera trapping	more than 3years	anthropogenic disturbance	research and monitoring
62	First Record of a Clouded Leopard Predating on a Binturong	2014	Malaysia	range	diet and food dynamics	wild	opa	na	non-invasive	empirical study	camera trapping	na	habitat loss and fragmentation	research and monitoring
63	Is the Clouded Leopard Neofelis nebulosa Extinct in Taiwan, and Could it be Reintroduced? An Assessment of Prey and Habitat	2014	Taiwan	range	habitat use and distribution	wild	pa	Tawu Nature Reserve and Twin Ghost Lake Important Willdife Area	non-invasive	empirical study	camera trapping	more than 3years	habitat loss and fragmentation	conservation plans and policies
64	Swimmer Syndrome in a Clouded Leopard (Neofelis nebulosa) Cub	2014	Thailand	range	anatomy and physiology	captivity	captive	na	non-invasive	empirical study	diagnosis and treatment	na	na	na
65	Well-differentiated Squamous Cell Carcinoma in a Captive Clouded Leopard (Neofelis nebulosa)	2014	Thailand	range	anatomy and physiology	captivity	captive	na	invasive	empirical study	diagnosis and treatment	na	na	na
66	Personality Structure in the Domestic Cat (Felis silvestris catus), Scottish Wildcat (Felis silvestris grampia), Clouded Leopard (Neofelis nebulosa), Snow Leopard (Panthera uncia), and African Lion (Panthera leo): A Comparative Study	2014	UK,USA	non-range	ethology	captivity	captive	na	non-invasive	empirical study	species sign survey and population observation	na	na	research and monitoring
67	Clouded Leopard Co-exist with Other Five Felids in Chitwan National park, Nepal	2014	Nepal	range	habitat use and distribution	wild	pa	Chitwan National park	non-invasive	empirical study	camera trapping	1-3months	na	na
68	Gross Morphological Studies on the Spleen of Clouded Leopard	2014	India	range	anatomy and physiology	na	na	na	invasive	empirical study	diagnosis and treatment	na	na	na
69	Status and Distribution of Smaller Cats in Myanmar	2014	Myanmar	range	habitat use and distribution	wild	both	Hkakaborazi National park	non-invasive	empirical study	camera trapping ,species sign survey and population observation,secondary data	na	habitat loss and fragmentation	conservation plans and policies
70	Body Mass Dynamics in Hand Reared Clouded Leopard (Neofelis nebulosa) Cubs from Birth to Weaning	2015	Thailand	range	anatomy and physiology	captivity	captive	na	non-invasive	empirical study	species sign survey and population observation	more than 3years	na	research and monitoring
71	Clouded in Mystery: The Global Trade in Clouded Leopards	2015	Nepal, Bhutan, India, Myanmar, Thailand, Cambodia, Malaysia, Bangladesh, China, Taiwan	range	threats	both	na	na	non-invasive	secondary analysis	secondary data,social survey	na	illegal trade and poaching	research and monitoring
72	The First Description of Population Density and Habitat Use of the Mainland Clouded Leopard Neofelis nebulosa within a Logged-primary Forest in South East Asia	2015	Malaysia	range	population	wild	pa	Temengor forest reserve	non-invasive	empirical study	camera trapping	na	na	na
73	Gross Morphological Studies on the Kidneys of Clouded Leopard	2015	India	range	anatomy and physiology	na	na	na	invasive	empirical study	diagnosis and treatment	na	na	na
74	Histologic and Immunohistochemical Characterization of Pheochromocytomas in 20 Clouded Leopards (Neofelis nebulosa)	2016	USA	non-range	anatomy and physiology	captivity	captive	NA	invasive	empirical study	diagnosis and treatment	na	na	na
75	Characterization of Multiple Pathways Modulating Aggression in the Male Clouded Leopard (Neofelis nebulosa)	2016	USA	non-range	anatomy and physiology	captivity	captive	na	invasive	empirical study	laboratory analysis	1-2years	na	na
76	Comparison of Subjective Well-Being and Personality Assessments in the Clouded Leopard (Neofelis nebulosa), Snow Leopard (Panthera uncia), and African Lion (Panthera leo)	2016	UK	non-range	ethology	captivity	captive	na	non-invasive	empirical study	species sign survey and population observation	na	na	research and monitoring, conservation plans and policies
77	Complete Mitochondrial Genome Sequence of the Indian Clouded Leopard (Neofelis nebulosa)	2016	India	range	molecular ecology	captivity	captive	na	invasive	empirical study	laboratory analysis	na	na	conservation plans and policies
78	Effects of Hand-Rearing on Reproductive Success in Captive Large Cats Panthera tigris altaica, Uncia uncia, Acinonyx jubatus and Neofelis nebulosa	2016	UK	non-range	ethology	captivity	captive	na	non-invasive	secondary analysis	secondary data	na	na	conservation plans and policies
79	Habitat Use and Predicted Range for the Mainland Clouded Leopard Neofelis nebulosa in Peninsular Malaysia	2016	Malaysia	range	habitat use and distribution	wild	both	Temengor Forest Reserve, pasoh Forest Reserve, Ulu Muda Forest Reserve	non-invasive	empirical study	camera trapping	more than 3years	habitat loss and fragmentation	na
80	Influence of Living Status (single vs. paired) and Centrifugation with Colloids on the Sperm Morphology and Functionality in the Clouded Leopard (Neofelis nebulosa)	2016	Thailand	range	molecular ecology	captivity	captive	na	invasive	empirical study	laboratory analysis	2-3years	na	conservation plans and policies
81	Mitigation of Sperm Tail Abnormalities Using Demembranation Approach in the Clouded Leopard (Neofelis nebulosa)	2016	Thailand	range	anatomy and physiology	captivity	captive	na	invasive	empirical study	diagnosis and treatment	na	na	na
82	Predator Mobbing and Interspeies Cooperation: An Interaction Between Gibbons, Langurs and a Clouded Leopard	2016	Indonesia	range	ethology	wild	opa	na	non-invasive	empirical study	species sign survey and population observation	more than 3years	na	na
83	The Conservation of Clouded Leopard Neofelis nebulosa (Griffith, 1821) in Bhutan	2016	Bhutan	range	conservation	wild	pa	Royal Manas National park	non-invasive	empirical study	camera trapping,sign survey	na	habitat loss and fragmentation,illegal wildlife trade	research and monitoring , conservation plans and policies
84	Surgical Management and Release of an Injured Clouded Leopard (Neofelis nebulosa macrosceloides) in Assam, India	2016	India	range	anatomy and physiology	na	na	na	invasive	empirical study	diagnosis and treatment	na	na	na
85	Clouded Leopard Co-exists with Six Other Felids in Royal Manas National park, Bhutan	2016	Bhutan	range	habitat use and distribution	wild	pa	Royal Manas National park	non-invasive	empirical study	camera trapping,sign survey	na	na	conservation plans and policies
86	Clouded Leopard	2016	China	range	habitat use and distribution	both	both	na	non-invasive	empirical study	camera trapping	1-2years	deforestation,habitat loss and fragmentation, poaching	research and monitoring
87	Prey Depletion as a Threat to the World’s Large Carnivores	2016	Nepal, India, Bangladesh, Bhutan, Myanmar, Thailand, Cambodia, Malaysia, Taiwan,China	range	threats	wild	both	na	non-invasive	secondary analysis	secondary data	na	habita loss and fragmentation	conservation plans and policies
88	181 Establishment of Induced Pluripotent Stem Cells from Fishing Cat and Clouded Leopard Using Integration-Free Method for wildlife conservation	2017	Thailand	range	molecular ecology	captivity	captive	na	invasive	empirical study	laboratory analysis	na	na	na
89	A Review of Our Current Knowledge of Clouded Leopards (Neofelis nebulosa)	2017	Nepal, India, Bangladesh, Bhutan, Myanmar, Thailand, Cambodia, Malaysia, Taiwan,China	range	review/synthesis	both	na	na	non-invasive	secondary analysis	secondary data	na	inadequate research and monitoring	research and monitoring
90	Habitat Use and Predicted range for the Mainland Clouded Leopard Neofelis Nebulosa in Peninsular Malaysia	2017	Malaysia	range	habitat use and distribution	wild	both	Temengor Forest Reserve, western region of Taman Negara National Park, Royal Belum State Park, Pasoh Forest Reserve and Ulu Muda Forest Reserve	non-invasive	empirical study	camera trapping	more than 3years	na	habitat management
91	Population Density Estimates and Conservation Concern for Clouded leopards Neofelis nebulosa, Marbled cats Pardofelis marmorata and Tigers Panthera tigris in Htamanthi Wildlife Sanctuary, Sagaing, Myanmar	2017	Myanmar	range	population	wild	pa	Htamanthi Wildlife Sanctuary	non-invasive	empirical study	camera trapping	2-3years	habitat loss and fragmentation	conservation plans and policies
92	Populations and Activity Patterns of Clouded leopards and Marbled cats in Dampa Tiger Reserve, India	2017	India	range	population	wild	pa	Dampa Tiger Reserve	non-invasive	empirical study	camera trapping	1-6months	na	na
93	Successful Laparoscopic Oviductal Artificial Insemination in the Clouded leopard (Neofelis nebulosa) in Thailand	2017	Thailand	range	anatomy and physiology	captivity	captive	na	both	empirical study	diagnosis and treatment	more than 3years	na	conservation plans and policies
94	The Vulnerable Clouded leopard Neofelis nebulosa in Nepal: an Update	2017	Nepal	range	conservation	wild	na	na	non-invasive	secondary analysis	secondary data	NA	habitat loss and fragmentation,illegal wildlife trade	research and monitoring
95	A Study on Activity Pattern of Clouded Leopard (Neofelis nebulosa) in Gunung Basor and Stong Utara Forest Reserves, Kelantan, Malaysia	2018	Malaysia	range	ethology	wild	pa	Gunung Basor Forest Reserve and Stong Utara Forest Reserves, Kelantan	non-invasive	empirical study	camera trapping	1-3months	na	research and monitoring
96	Density of Clouded Leopard (Neofelis nebulosa) in Gunung Basor-Stong Utara Forest Reserve, Kelantan, Malaysia	2018	Malaysia	range	habitat use and distribution	wild	pa	Gunung Basor forest Reserve and Stong Utara Forest Reserves, Kelantan	non-invasive	empirical study	camera trapping	1-3months	na	research and monitoring
97	Directional Selection in the Evolution of Elongated Upper Canines in Clouded Leopard and Sabre-toothed Cats	2018	Japan	non-range	molecular ecology	captivity	captive	na	invasive	empirical study	models and modelling	na	na	na
98	Identifying Important Conservation Areas for the Clouded Leopard Neofelis Nebulosa in a Mountainous Landscape: Inference from Spatial Modeling Techniques	2018	Bhutan	range	habitat use and distribution	wild	both	Jigme Khesar Strict Nature Reserve,Jigme Dorji National Park,Phipsoo Wildlife Sanctuary,Jigme Singye Wangchuck National Park,Royal Manas National Park,Wangchuck Centennial National Park,Phrumsengla National Park, Bumdelling Wildlife Sanctuary,Sakteng Wildlife Sanctuary.	non-invasive	empirical study	camera trapping,secondary data	7-12months	habitat loss and fragmentation	conservation plans and policies
99	Analysis of metabolic flux in felid spermatozoa using metabolomics and 13C-based fluxomics	2019	USA	non-range	anatomy and physiology	captivity	captive	na	invasive	empirical study	diagnosis and treatment	na	na	na
100	Application of Cat Microsatellite Markers in the Forensic Paternity Dispute and Identity Test in Domestic Cat, Tiger and Clouded Leopard	2019	Thailand	range	molecular ecology	captivity	captive	na	invasive	empirical study	laboratory analysis	na	na	na
101	Clouded Leopard in Biological Corridor of Bhutan, an Opportunity for Population Dispersal	2019	Bhutan	range	habitat use and distribution	wild	opa	na	non-invasive	empirical study	camera trapping	na	habitat loss and fragmentation	conservation plans and policies
102	Clouded Leopard in Sikles_x0002_Bhujung Landscape, Annapurna Conservation Area, Nepal	2019	Nepal	range	habitat use and distribution	wild	pa	Annapurna Conservation area	non-invasive	empirical study	camera trapping	1-2years	habitat loss and fragmentation	conservation education and awareness
103	Clouded Leopard: The Sixth Felid of Valmiki Tiger Reserve, Bihar, India	2019	India	range	habitat use and distribution	wild	pa	Valmiki Tiger Reserve	non-invasive	empirical study	camera trapping	7-12months	na	research and monitoring
104	Factors Affecting the Occurance and Activity of Clouded Leopards, Common Leopards and Leopard Cats in the Himalayas	2019	Nepal	range	habitat use and distribution	wild	pa	Langtang National Park	non-invasive	empirical study	camera trapping	1-2years	na	research and monitoring
105	First Photographic Evidence of Fishing Cat Prionailurus viverrinus Bennett, 1833 and Clouded Leopard Neofelis nebulosa Griffith, 1821 (Carnivora: Felidae) in Parsa National Park, Nepal	2019	Nepal	range	habitat use and distribution	wild	pa	Parsa National Park	non-invasive	empirical study	camera trapping	1-6months	na	research and monitoring
106	Multi‐Scale Habitat Modelling Identifies Spatial Conservation Priorities for Mainland Clouded leopards (Neofelis nebulosa)	2019	Nepal, Bhutan, India, Myanmar, Thailand, Cambodia, Malaysia, Bangladesh, China, Taiwan	range	conservation	wild	na	na	non-invasive	empirical study	models and modelling,camera trapping	na	habitat loss and fragmentation	habitat management
107	Pulmonary Squamous Cell Carcinoma in a Captive Clouded leopard (Neofelis nebulosa)	2019	Thailand	range	anatomy and physiology	captivity	captive	na	invasive	empirical study	diagnosis and treatment	na	na	na
108	Clouded Leopard (Neofelis nebulosa) Morbidity and Mortality in Captive-bred Populations	2020	Thailand, Japan, China, India	both	review/synthesis	captivity	captive	na	non-invasive	secondary analysis	secondary data	na	na	na
109	Clouded Leopard Neofelis nebulosa (Grifth, 1821) (Mammalia: Carnivora: Felidae) in Illegal Wildlife Trade in Nepal	2020	Nepal	range	threats	wild	na	na	non-invasive	secondary analysis	secondary data	na	illegal wildlife trade	conservation plans and policies
110	Density and Movements of Mainland Clouded Leopards (Neofelis nebulosa) under Conditions of High and Low Poaching Pressure	2020	Thailand	range	population	wild	pa	Khlong Saeng e Khao Sok Forest Complex	non-invasive	empirical study	camera trapping,secondary data	7-12months	na	research and monitoring
111	Evaluating Support for Clouded Leopard Reintroduction in Taiwan: Insights from Surveys of Indigenous and Urban Communities	2020	Taiwan	range	human dimensions of conservation	wild	na	na	non-invasive	empirical study	social survey	na	na	conservation education and awareness
112	Simulating the Impact of Belt and Road Initiative and Other Major Developments in Myanmar on an Ambassador Felid, the Clouded leopard, Neofelis nebulosa	2020	India, Myanmar, Thailand, Bangladesh, China	range	conservation	wild	opa	na	non-invasive	empirical study	models and modelling	na	habitat loss and fragmentation	conservation plans and policies
113	Strongholds Under Siege: range-Wide Deforestation and Poaching Threaten Mainland Clouded leopards (Neofelis nebulosa)	2020	Nepal, Bhutan, India, Myanmar, Thailand, Cambodia, Malaysia, Bangladesh, China, Taiwan	range	habitat use and distribution	wild	both	Hukuang Valley Wildlife Sanctuary,Htamanthi Wildlife Sanctuary,Namdapha National Park,Kaeng Krachan National Park,Kaeng Krachan National Park,	non-invasive	secondary analysis	models and modelling	na	habitat loss and fragmentation,illegal wildlife trade	habitat management
114	Taiwanese Attitudes Toward the Clouded leopard (Neofelis nebulosa) and its Potential Reintroduction	2020	Taiwan	range	human dimensions of conservation	wild	pa	Tawushan Nature Reserve	non-invasive	empirical study	social survey	1-6months	na	conservation education and awareness
115	Mainland Clouded Leopard: IUCN Red List Status Update	2021	Nepal, Bhutan, India, Myanmar, Thailand, Cambodia, Malaysia, Bangladesh, China, Taiwan	range	conservation	wild	na	na	both	secondary analysis	secondary data	na	habitat loss and fragmentation	research and monitoring
116	Mapping Distribution and Identifying gaps in Protected Area Coverage of Vulnerable Clouded Leopard (Neofelis nebulosa) in Nepal: Implications for Conservation Management	2021	Nepal	range	habitat use and distribution	wild	both	Annapurna Conservation Area, Langtang National Park, Parsa National Park, Shivapuri Nagarjuna National Park, Kanchanjunga Conservation Area	both	secondary analysis	secondary data	na	na	research and monitoring
117	An Update on the Current Distribution and Key Habitats of the Clouded Leopard (Neofelis nebulosa) populations in China	2022	China	range	habitat use and distribution	wild	na	na	non-invasive	empirical study	camera trapping,secondary data	na	habitat loss and fragmentation	habitat management
118	Breeding Soundness Examination in a Clouded leopard	2022	USA	non-range	ethology	captivity	captive	Nashville Zoo (samples taken to USA from here)	invasive	empirical study	diagnosis and treatment	na	na	na
119	Clouded Leopard (Neofelis nebulosa) in Captivity: A Scenario in Indian zoos	2022	India	range	conservation	captivity	captive	na	non-invasive	secondary analysis	secondary data	na	na	conservation plans and policies
120	Diet and Prey Selection of Clouded Leopards and Tigers in Laos	2022	Laos	range	diet and food dynamics	wild	pa	e Nam Et-Phou Louey National Protected Area	non-invasive	empirical study	camera trapping	more than 3years	na	research and monitoring
121	Molecular and Pathological Screening of Canine Distemper Virus in Asiatic lions, Tigers, Leopards, Snow leopards, Clouded leopards, Leopard cats, Jungle cats, Civet cats, Fishing cat, and Jaguar of Different States, India	2022	India	range	threats	both	na	na	invasive	empirical study	diagnosis and treatment	2-3years	diseases	na
122	Oleps' Traditional Beliefs of the Clouded Leopard the top predator of Bhutan	2022	Bhutan	range	human dimensions of conservation	wild	pa	Jigme Singye Wangchuck National Park	non-invasive	empirical study	social survey	na	inadequate research and monitoring	research and monitoring
123	Secrets of the Clouded Leopard: Abundance, Habitat Use and Carnivore Coexistence in Tropical Forest of Manas National Park, Assam, India	2022	India	range	population	wild	pa	Manas National Park	non-invasive	empirical study	camera trapping	1-6months	inadequate research and monitoring	research and monitoring
124	Semiochemicals from Urine and Hair of Clouded Leopard (Neofelis nebulosa Griffith, 1821)	2022	India	range	anatomy and physiology	captivity	captive	na	invasive	empirical study	diagnosis and treatment	na	na	na
125	Whole Genome Analysis of Clouded leopard Species Reveals an Ancient Divergence and Distinct Demographic Histories	2022	USA	non-range	molecular ecology	captivity	captive	na	invasive	empirical study	laboratory analysis	na	habitat loss and fragmentation,illegal wildlife trade	research and monitoring
126	Abundance and Distribution of Asiatic Golden Cat (Catopumma teminckii Vigors and Horsfield) and Clouded Leopard (Neofelis nebulosa Grifith) in Jomotsangkha wildlife Sanctuary, Bhutan	2019	Bhutan	range	habitat use and distribution	wild	pa	Jomotsankha Wildlife Sanctuary	non-invasive	empirical study	camera trapping	1-6months	habitat loss and fragementation	research and monitoring
